# Supplementary material for: Phage-Derived Peptidoglycan Degrading Enzymes: Challenges and Future Prospects for In Vivo Therapy
Source: MDPI journal article supplement (doi:10.3390/v10060292), 2018-05-29
Supplement: s1 [file s1]

**Table S1. Compilation of phage lytic enzymes that have been tested in animal models of human systemic infections.**

| Enzybiotic      | Native / Engineered | Bacterial pathogen       | Animal Model <sup>1</sup> | Administration route <sup>1,2</sup> | Regimen (Dose and time of treatment)                                                       | Main results                                                                                                                                                                                         | Refs  |
|-----------------|---------------------|--------------------------|---------------------------|-------------------------------------|--------------------------------------------------------------------------------------------|------------------------------------------------------------------------------------------------------------------------------------------------------------------------------------------------------|-------|
| Cpl-1           | N                   | <i>S. pneumoniae</i>     | Bacteraemia               | i.p.                                | Single dose (0.4 or 1 mg/kg of mouse)<br>1 h-postinfection                                 | 0% buffer-treated and 0% enzybiotic-treated mice survived.<br>Combination with daptamyxin resulted in ≥ 80% survival.                                                                                | [89]  |
|                 | N                   | <i>S. pneumoniae</i>     | Bacteraemia               | i.v.                                | Single or multiple dose (2 mg/mouse)<br>1 h-postinfection or 5 and 10-postinfection        | 20% buffer-treated and 100% enzybiotic-treated mice survived.<br>In advance bacteraemia (5 and 10 h after infection) all mice died.                                                                  | [73]  |
| Cpl-1, Pal      | N                   | <i>S. pneumoniae</i>     | Sepsis                    | i.p.                                | Single dose (5 to 200 µg/mouse)<br>1 h-postinfection                                       | 0% buffer-treated and 100% C-treated mice survived with 200 µg of either enzyme. Survival rate was 0% with 5 µg. Cpl1 synergizes with Pal.                                                           | [48]  |
| Cpl-771, Cpl-1  | E, N                | <i>S. pneumoniae</i>     | Bacteraemia               | i.p.                                | Single dose (25 to 500 µg/mouse)<br>1 h-postinfection                                      | 0% buffer-treated, ≥45% cpl-771-treated and ≥20% Cpl-1-treated mice survived. With highest doses, 100% and 30% survived, respectively.<br>Cpl-771 was 50% superior than Cpl-1.                       | [78]  |
| Ply30           | N                   | <i>S. suis / S. equi</i> | Bacteraemia               | i.p.                                | Single dose (2 mg/mouse)<br>1 h-postinfection                                              | 0% buffer-treated and ≥80% enzybiotic-treated mice survived within 96 h post treatment.                                                                                                              | [90]  |
| PlyPy           | N                   | <i>S. pyogenes</i>       | Bacteraemia               | i.p.                                | Single dose (0.25 or 0.5 mg/mouse)<br>3 h-postinfection                                    | 17% buffer-treated and ≥90% enzybiotic-treated mice survived 72 h post treatment.                                                                                                                    | [91]  |
| PlySK1249       | N                   | <i>S. agalactiae</i>     | Bacteraemia               | i.p.                                | Single or multiple dose (22.5 to 45 mg/kg of mouse)<br>1 h or 2, 20 and 24 h-postinfection | No differences between buffer and treated group when administrated 1 h-postinfecton. Only consecutive doses (2, 20 and 24 h after challenge), treatment recused 60% more mice then control group.    | [92]  |
| ClyR            | E                   | <i>S. agalactiae</i>     | Bacteraemia               | i.p.                                | Single dose (25 to 40 mg/kg of mouse)<br>3 h-postinfection                                 | 0% non-treated and ≥25% enzybiotic-treated mice survived. Total protection was obtained with the highest ClyR dose.                                                                                  | [93]  |
| ClyS            | E                   | <i>S. aureus</i>         | Septicaemia               | i.p.                                | Single dose (2 mg/mouse)<br>3 h-postinfection                                              | 0% buffer-treated and 88% enzybiotic-treated mice survived.<br>CF-301 has a synergistic effect with oxacillin.                                                                                       | [54]  |
| ClyH            | E                   | <i>S. aureus</i>         | Bacteraemia               | i.p.                                | Single dose (450 or 900 µg/mouse)<br>3 h-postinfection                                     | 0% buffer-treated and ≥66.7% enzybiotic-treated mice survived. A 100% survival was reach with highest dose. Daily injections of ClyH did not cause harmful effects.                                  | [101] |
| MR-10           | N                   | <i>S. aureus</i>         | Bacteraemia               | subcutaneously                      | Single dose (50 µg/mouse)<br>3 h-postinfection                                             | 0% buffer-treated and 100% enzybiotic and -treated mice survived.<br>Individual therapy (MR-10 or minocycline) resulted in 35% survival.                                                             | [102] |
| LysGH15         | N                   | <i>S. aureus</i>         | Bacteraemia               | i.p.                                | Single dose (5 to 100 µg/mouse)<br>1, 2, 3 or 4 h-postinfection                            | 0% non-treated and 100% enzybiotic-treated mice survived with ≥50 µg.<br>Prolonged administrations (2, 3 and 4 h) had 40% to 0% survival rate.                                                       | [103] |
| CF-301 (PlySs2) | N                   | <i>S. aureus</i>         | Bacteraemia               | i.p.                                | Single dose (0.25 to 5 mg/kg of mouse)<br>3 h-postinfection                                | 0% buffer-treated and ≥20% enzybiotic-treated mice survived for ≥2.5 mg/kg doses. A maximum 70% survival was reached with the highest dose.<br>CF-301 synergizes with vancomycin or with daptomycin. | [104] |

|                                     |      |                                            |             |      |                                                                          |                                                                                                                                                                                                      |       |
|-------------------------------------|------|--------------------------------------------|-------------|------|--------------------------------------------------------------------------|------------------------------------------------------------------------------------------------------------------------------------------------------------------------------------------------------|-------|
|                                     |      | <i>S. aureus</i> and<br><i>S. pyogenes</i> | Bacteraemia | i.p. | Single dose (2 to 4 mg/kg of mouse)<br>3 h-postinfection                 | 0% buffer-treated and 92% enzybiotic-treated mice survived from mixed infection. PlyC or ClyS added to in the same concentrations, failed.                                                           | [105] |
| MV-L                                | N    | <i>S. aureus</i>                           | Bacteraemia | i.p. | Single dose (500 U/mouse)<br>30 or 60 min-postinfection                  | 0% buffer-treated and ≥60% enzybiotic-treated mice survived when added 60 min after challenge. Fully protection was reached at 30 min.                                                               | [45]  |
| SAL-1                               | N    | <i>S. aureus</i>                           | Bacteraemia | i.v. | Multiple dose (12.5 to 25 mg/kg of mice)<br>1, 25 and 49 h-postinfection | 20% non-treated and ≥93.3% enzybiotic-treated mice survived. Bacterial counts were significantly reduced in the bloodstream and splenic tissue.                                                      | [106] |
| 8 enzybiotics<br>and<br>lysostaphin | N, E | <i>S. aureus</i>                           | Bacteraemia | i.p. | Single dose (200 µg/mouse)<br>30 min-postinfection                       | 30% buffer-treated and 100% enzybiotic-treated mice survived. Twort, phiSH2 and P68 had lower survival rates of 50%, 60% and 20%.                                                                    | [107] |
| PlyG                                | N    | <i>B. anthracis</i>                        | Sepsis      | i.p. | Single dose (50 U/mouse)<br>15 min-postinfection                         | 0% buffer-treated and 68.4% enzybiotic-treated mice survived. No toxicity was detected.                                                                                                              | [109] |
| LysEF-P10                           | N    | <i>E. faecalis</i>                         | Bacteraemia | i.p. | Single dose (1 to 10 µg/mouse)<br>1 h-postinfection                      | 0% buffer-treated and 100% enzybiotic-treated mice survived for ≥ 5µg doses. Lowest dose (1 µg) only rescued 20% of mice. LysEF-P10 triggers antibodies but does not abolish the enzymatic activity. | [110] |
| PlyF307                             | N    | <i>A. baumannii</i>                        | Sepsis      | i.p. | Single dose (1 mg/mouse)<br>2 h-postinfection                            | 10% buffer-treated and 50% enzybiotic-treated mice survived. Enzybiotic also removed biofilms in a <i>in vivo</i> catheter model.                                                                    | [112] |

<sup>1</sup> murine model unless stated otherwise;

<sup>2</sup> i.v., intravenously; i.p., intraperitoneal;
